# Supplementary material
Source: ML conference proceedings conference paper supplement (https://proceedings.mlr.press/v222/jha24a.html)
Supplement: Supplementary file 1 [file jha24a-supp.pdf]

## Appendix A. Dataset Details

We use Avazu, Criteo-Kaggle and Criteo-Terabyte, three large popular open source benchmark CTR datasets to evaluate MEM-REC. Table 1 provides the details like the number of data points, alphabet size, number of dense and sparse features etc. of these datasets. Each record has numeric and categorical features describing an online advertisement served to users as a web/mobile advertisement. The goal is to predict whether or not a user clicks on an ad.

|                          | <b>Avazu</b> | <b>Criteo<br/>Kaggle</b> | <b>Criteo<br/>Terabyte</b> |
|--------------------------|--------------|--------------------------|----------------------------|
| Data points (Millions)   | 40           | 46                       | 430                        |
| Alphabet Size (Millions) | 9            | 34                       | 188                        |
| num_dense_features       | 0            | 13                       | 13                         |
| num_sparse_features      | 22           | 26                       | 26                         |
| num_days                 | 10           | 7                        | 24                         |

Table 1: Dataset properties

## Appendix B. Dataset Partitioning

The dataset contains  $n$  consecutive days of data, each with an approximately equal number of samples. Typically, data points from the first  $(n - 1)$  days are used as the training set while the data points from the  $n$ th day are split into a validation and test set. We follow this approach for partitioning the data as well.

## Appendix C. Hyperparameters

We follow the basic setup like optimizer, sparse feature size, MLP architecture as suggested by the DLRM paper and their GitHub implementation. These parameters are summarized in Table 2.

| hyperparameter      | value                           |                     |
|---------------------|---------------------------------|---------------------|
|                     | <b>Criteo-Kaggle<br/>/Avazu</b> | <b>Criteo-TB</b>    |
| sparse-feature-size | 16                              | 128                 |
| arch-mlp-bot        | 13-512-256-64-16                | 13-512-256-128      |
| arch-mlp-top        | 512-256-1                       | 1024-1024-512-256-1 |
| loss-function       | bce                             | bce                 |
| optimizer           | SGD                             | SGD                 |

Table 2: DLRM Baseline Hyperparameters
